# Supplementary material for: Identification of methylation sites and signature genes with prognostic value for luminal breast cancer
Source: Springer Nature journal article supplement (doi:10.1186/s12885-018-4314-9), 2018-04-11

### SOSTDC1

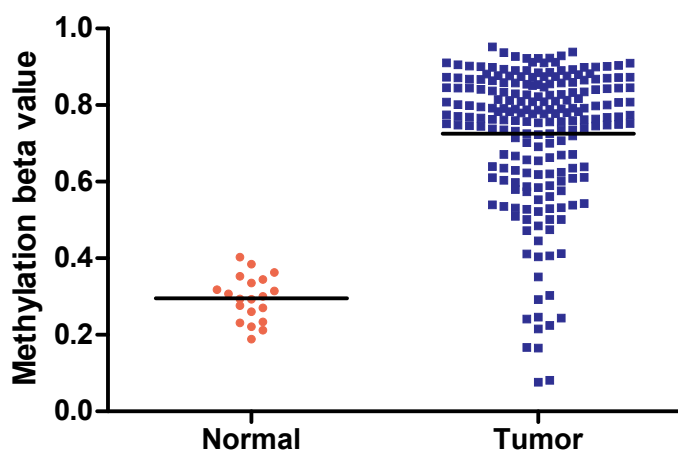

Supplement: MOESM2 [file 15611800]
